# Supplementary material for: Numerical investigation on retrieval errors of mixing states of fractal black carbon aerosols using single-particle soot photometer based on Mie scattering and the effects on radiative forcing estimation
Source: Copernicus journal article supplement (doi:10.5194/amt-16-4961-2023), 2023-10-27
Supplement: Supplementary file 1 [file amt-16-4961-2023-supplement.pdf]

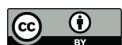

## *Supplement of*

# **Numerical investigation on retrieval errors of mixing states of fractal black carbon aerosols using single-particle soot photometer based on Mie scattering and the effects on radiative forcing estimation**

**Jia Liu et al.**

*Correspondence to:* Jia Liu ([liujia@hbu.edu.cn](mailto:liujia@hbu.edu.cn))

The copyright of individual parts of the supplement might differ from the article licence.

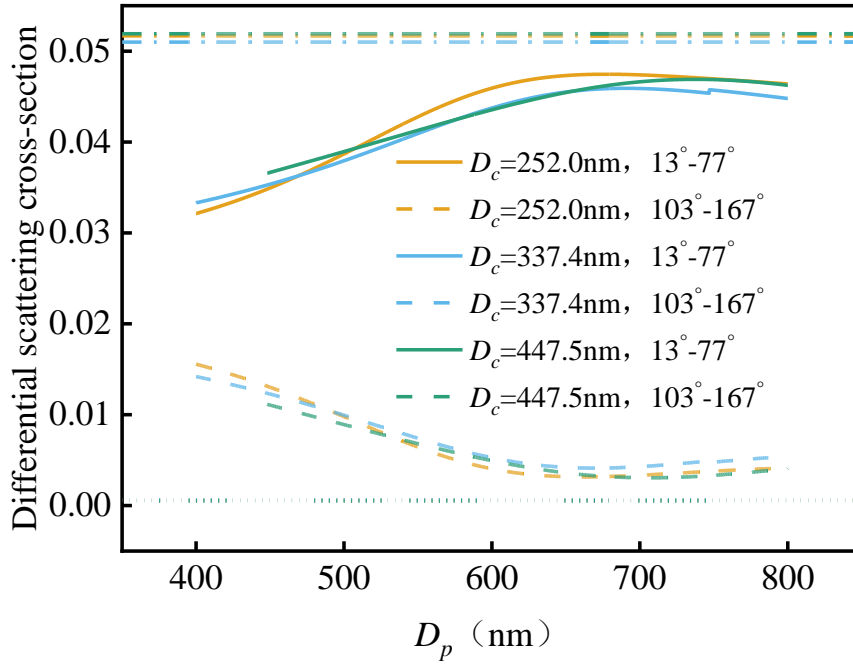

**Figure S1.** The variation of differential scattering cross-sections with coated particle diameter  $D_p$  of core-shell models with  $D_c=252.0$  nm, 337.4 nm, 447.5 nm. The solid and dotted lines indicate differential scattering cross-sections integral from  $13^\circ$  to  $77^\circ$  and from  $103^\circ$  to  $167^\circ$ . The dot-dashed and short-dotted lines indicate the maximum value of the forward differential scattering cross-section and the minimum value of the backward differential scattering cross-section of the corresponding fractal models.

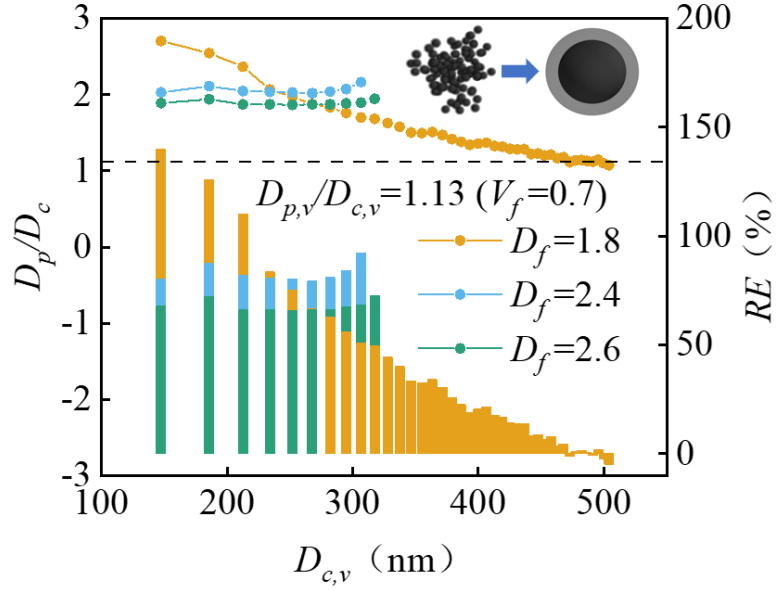

**Figure S2.** Retrieved mixing state ( $D_p/D_c$ ) and relative error ( $RE$ ) as functions of volume equivalent diameter ( $D_{c,v}$ ) for thinly coated BC particles with  $D_f = 1.8, 2.4, 2.8$  and  $D_{p,v}/D_{c,v} = 1.13$ . The colored lines stand for retrieved  $D_p/D_c$  and the colored bars stand for  $RE$ .
